# Supplementary material for: A full wave description for thin wire structures with TLST and perturbation theory
Source: Copernicus journal article supplement (doi:10.5194/ars-16-123-2018), 2018-09-04
Supplement: Supplementary file 1 [file ars-16-123-2018-supplement.zip]

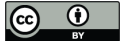

## *Supplement of*

# **A full wave description for thin wire structures with TLST and perturbation theory**

**Fabian Ossevorth et al.**

*Correspondence to:* Fabian Ossevorth ([fabian.ossevorth@tu-dresden.de](mailto:fabian.ossevorth@tu-dresden.de))

- [ars-16-123-2018-supplement-title-page.pdf](#)
- Supplement
  - [Matricants\\_simple-wire-example-1-1.2e9.csv](#)
  - [Matricants\\_simple-wire-example-1-1e6.csv](#)
  - [Matricants\\_simple-wire-example-1-600e6.csv](#)
  - [Matricants\\_simple\\_wire\\_PT\\_LF.csv](#)
  - [Matricants\\_simple\\_wire\\_TLST0\\_LF\\_TLST0.csv](#)
  - [Parameters\\_simple-wire-example-1-1.2e9.dat](#)
  - [Parameters\\_simple-wire-example-1-1e6.dat](#)
  - [Parameters\\_simple-wire-example-1-600e6.dat](#)
  - [Parameters\\_simple\\_wire\\_PT\\_LF.dat](#)
  - [Parameters\\_simple\\_wire\\_TLST0\\_LF\\_TLST0.dat](#)
  - [i0s\\_2xCircle-R=1-1e6-2e9.csv](#)
  - [i0s\\_Example-wire-1MHz-2GHz.csv](#)
  - [i0s\\_simple\\_wire\\_PT\\_LF.csv](#)
  - [i0s\\_simple\\_wire\\_TLST0\\_LF.csv](#)
  - [i1s\\_2xCircle-R=1-1e6-2e9.csv](#)
  - [i1s\\_Example-wire-1MHz-2GHz.csv](#)
  - [i1s\\_simple\\_wire\\_PT\\_LF.csv](#)
  - [i1s\\_simple\\_wire\\_TLST0\\_LF.csv](#)

The copyright of individual parts of the supplement might differ from the CC BY 4.0 License.
